# Supplementary material for: Assembly of Fe3O4 nanoparticles on PEG-functionalized graphene oxide for efficient magnetic imaging and drug delivery
Source: Royal Society of Chemistry journal article supplement (doi:10.1039/c5ra09901c), 2015-01-01
Supplement: c5ra09901c1.pdf [file c5ra09901c1.pdf]

## Supporting Information

Assembly of Fe<sub>3</sub>O<sub>4</sub> Nanoparticles onto PEG-functionalized Graphene Oxide for Efficient  
Magnetic Imaging and Drug Delivery

Weihong Chen, \*†<sup>a</sup> Xin Wen, †<sup>a</sup> Guorong Zhen, <sup>a</sup> and Xiuwen Zheng, \*<sup>a</sup>

<sup>a</sup> School of Chemistry & Chemical Engineering, Linyi University,  
Linyi, Shandong, 276005, P.R.China

Tel:+86-539-8766598

\* Corresponding author E-mail: cwh578@163.com; xwzheng1976@gmail.com

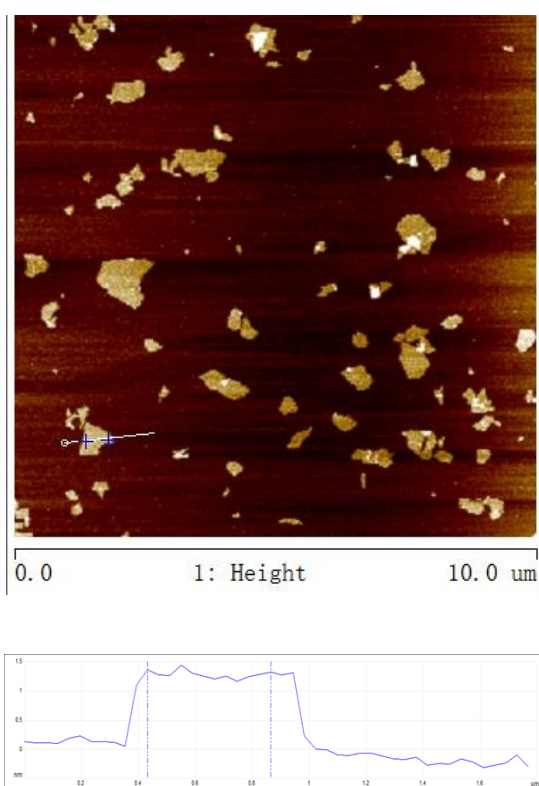

Fig. S1 AFM images of GO sheets

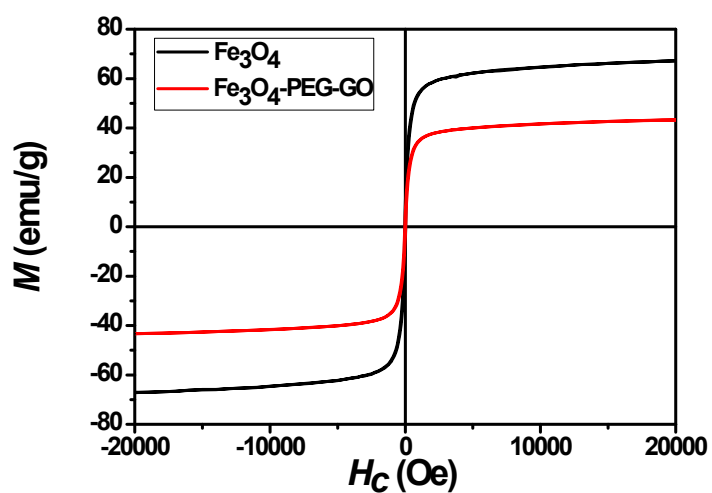

Fig. S2 Magnetization curves of DMSA-coated  $\text{Fe}_3\text{O}_4$  NP and  $\text{Fe}_3\text{O}_4$ -PEG-GO composites.

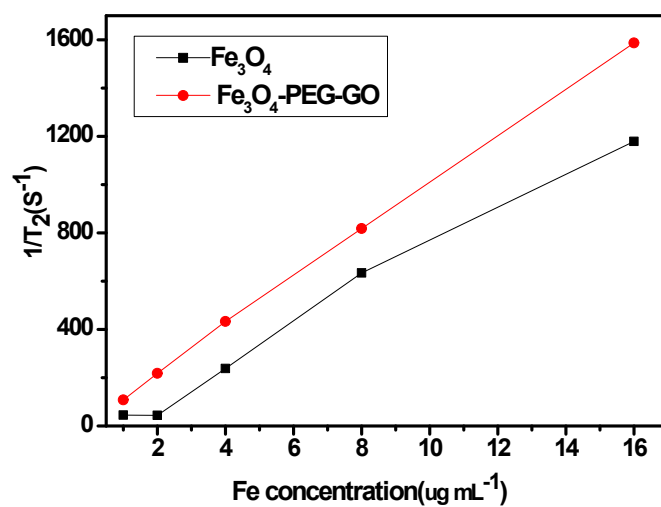

Fig. S3 T2 relaxation rates ( $1/T_2 \text{ s}^{-1}$ ) of the  $\text{Fe}_3\text{O}_4$ -PEG-GO nanocomposites, the DMSA- $\text{Fe}_3\text{O}_4$  NPs, as a function of iron concentration ( $\mu\text{g mL}^{-1}$ ).

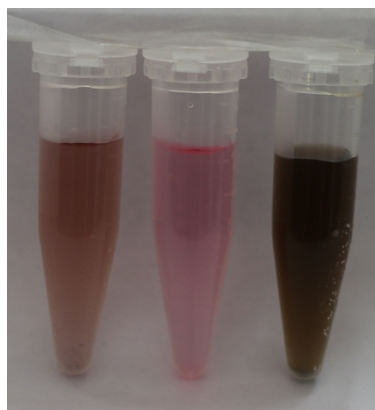

Fig. S4 Photographs of the  $\text{Fe}_3\text{O}_4\text{-GO}$  composites in the RPMI 1640 medium with 10% fetal bovine serum (A), the RPMI 1640 medium with 10% fetal bovine serum (B), and the  $\text{Fe}_3\text{O}_4\text{-GO}$  composites in water (C). Photos were taken after the samples stored at ambient condition for 24 h.
